# Supplementary material for: CDC50 Orthologues in Plasmodium falciparum Have Distinct Roles in Merozoite Egress and Trophozoite Maturation
Source: PubMed Central journal article supplement (PMC9426505; doi:10.1128/mbio.01635-22), 2022-07-12

**Figure S1**

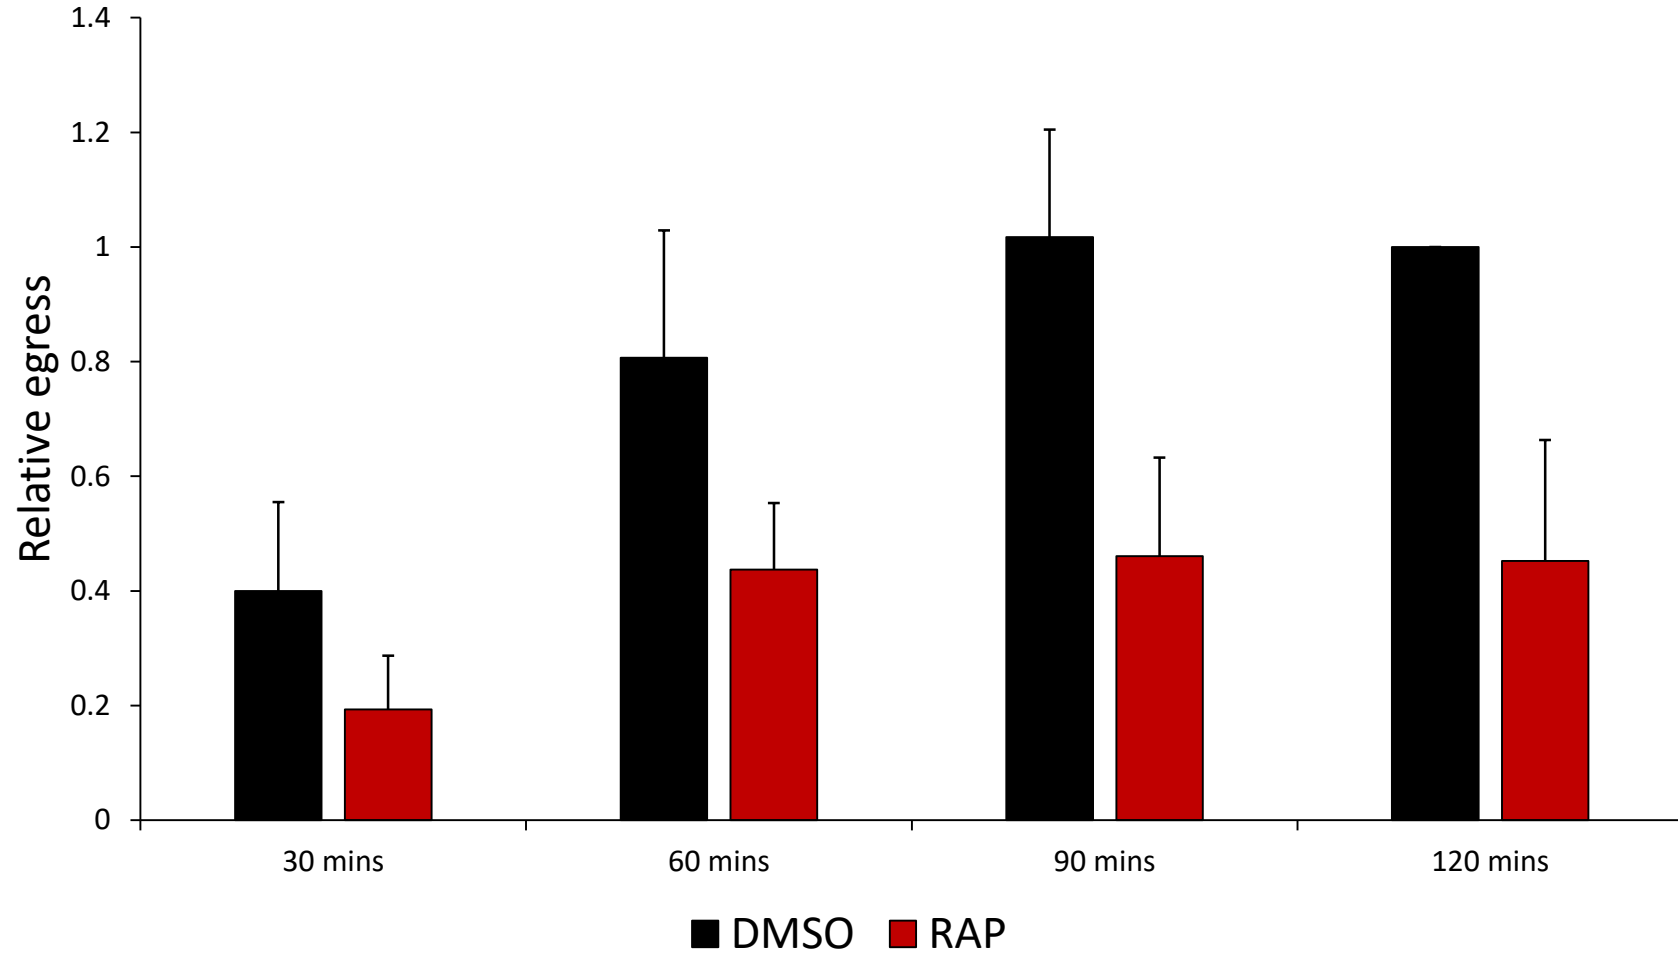

Supplement: mbio.01635-22-s0002.pdf [file mbio.01635-22-s0002.pdf]
