# Supplementary material for: CDC50 Orthologues in Plasmodium falciparum Have Distinct Roles in Merozoite Egress and Trophozoite Maturation
Source: PubMed Central journal article supplement (PMC9426505; doi:10.1128/mbio.01635-22), 2022-07-12

Figure S5

1

All Events - Sample

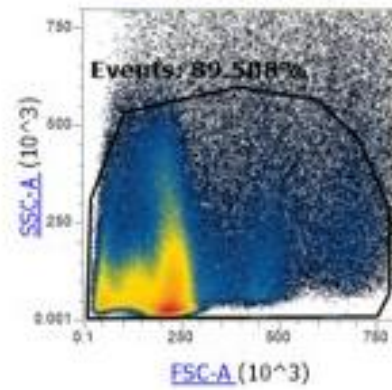

2

Events - Sample

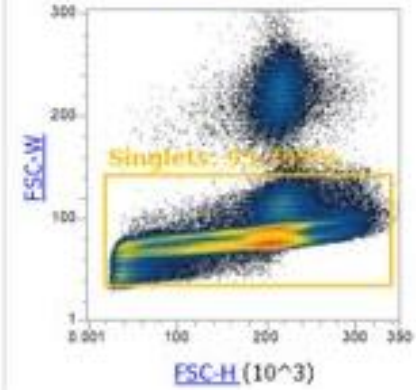

3

Singlets - Sample

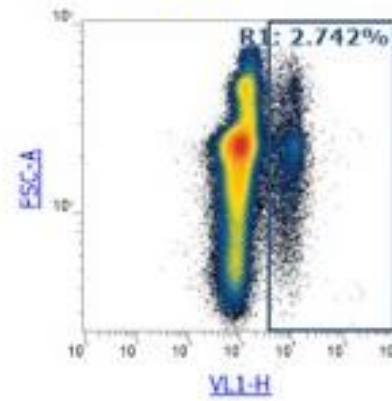

4

R1 - Sample

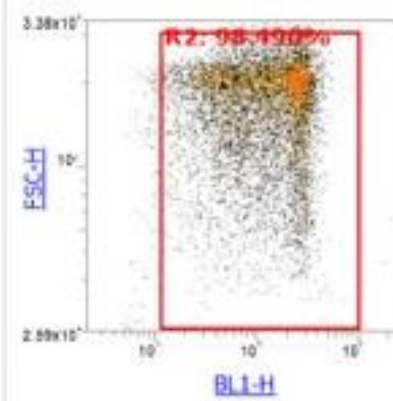

5

R2 - Sample

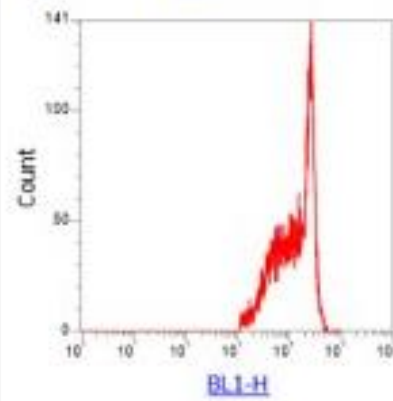

Supplement: mbio.01635-22-s0006.pdf [file mbio.01635-22-s0006.pdf]
