# Supplementary material for: CDC50 Orthologues in Plasmodium falciparum Have Distinct Roles in Merozoite Egress and Trophozoite Maturation
Source: PubMed Central journal article supplement (PMC9426505; doi:10.1128/mbio.01635-22), 2022-07-12
Supplement: mbio.01635-22-s0010.pdf [file mbio.01635-22-s0010.pdf]

Figure S9

A)

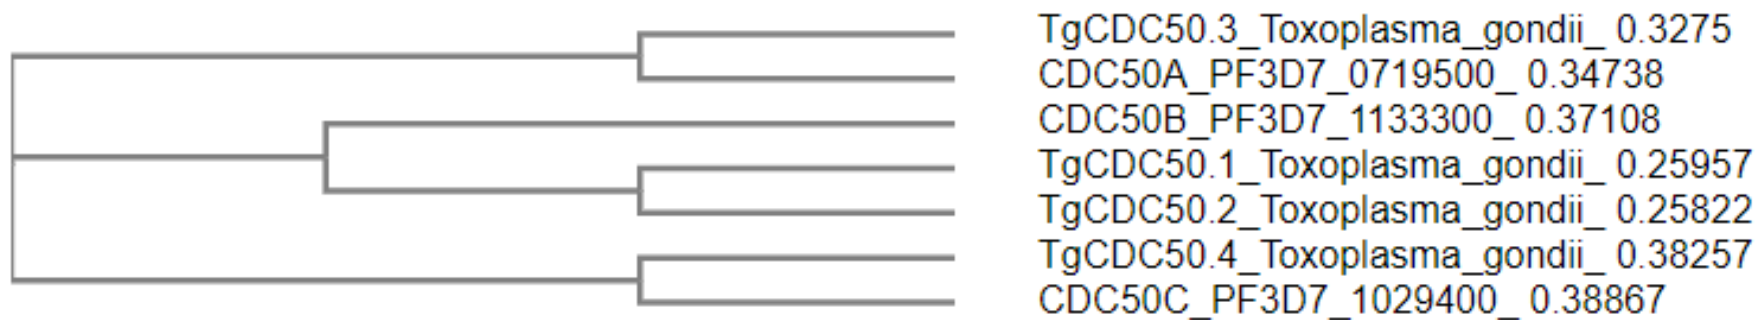

B)

**Alignment of *P. falciparum* CDC50s alongside Cdc50p and LEM3 from *S. cerevisiae* and cdc50a from *H. sapiens* showing the region surrounding the conserved Asn 180 (HsCdc50a) glycosylation site**

|          |                                                                                                                                                                                                     |     |
|----------|-----------------------------------------------------------------------------------------------------------------------------------------------------------------------------------------------------|-----|
| ScCdc50p | L T N F Y Q N H R R Y V Q S F D T K Q I L G E P I K K D D L D T S C S P I R S R E D - K I I Y P C G L I A N S M E N D T F S Q V L S G I D D T E D - Y N L T N K H I S W S I D R - H R F K T T K Y N | 237 |
| ScLem3   | L E K F A A N H R R Y V L S F S E D Q I R G E D A S 5 D A T G I N C K P L S K N A D G K I Y Y P C G L I A N S M E N D T F P L Q L T N V G D T S N N Y S L T N K G I N W E S D K - K R Y K K T K Y N | 279 |
| HsCDC50a | L S N F Y Q N H R R Y V K S R D D S Q L N G D S S A L L N P S K E C E P Y R R N E D - K P I A P C G A I A N S M E N D T L E L F L I G N D S Y P I P I A L K K K G I A W W T D K N V K F R N P P G G | 220 |
| PfCDC50A | I 5 N F Y Q N H K K Y L V S K S H N Q L M G T V Y T K D N E V S Q C G P I T K N H E G K I L H P C G L I A R S I F N D T F S V Y M D R E L H N M I K L D E S K E G I T W Y S D Y N K F K N P S D S E | 332 |
| PfCDC50B | V 5 G M Q Q N H Y K F V S G M K K E Q L N G N I F L K K E E L E E C Y P L I T F S E 5 K L L H P C G I F P W N V F T D S Y I F Y D K E P D E V P F P T P L P L K 5 I T I K Y Y R Q F Y K N P S P Q N | 229 |
| PfCDC50C | V S N F Y I N F K T F L S D E S H S L V N E K I P K K K K K N Q K C H I S D L K P E 3 K K I F P C G L V S A A I F N D K I A L S K N S V N Y D I D K F P I L H 3 F L T Y M K K H K Q F T N Y K I W I | 335 |



|         | P-domain                                                                                                              | Phosphorylation site        | N-domain                                                           |                                                                   |      |
|---------|-----------------------------------------------------------------------------------------------------------------------|-----------------------------|--------------------------------------------------------------------|-------------------------------------------------------------------|------|
| ATP8A1  | INWDLDMHYEPTDAAMARTSNLNEELGQVKYIFSDKTGTLTCNV                                                                          | MQFKKCTIAGVAYGHVPEPE        | YGCSPDEWQNSQFGDEK-TFSDSSLLENLQN---NHPTAPIICEFLTMMAV                | 486                                                               |      |
| Drs2p   | IGSDLDLIYEKTDTPVVRTSSLVEELGQIEYIFSDKTGTLTRNIMEFKSCSIAGHCYIDKI-PEDKTATVE--DGIIEVGYR---KFDDLKKKLNDP---SDEDSPIINDFLTLLAT |                             |                                                                    | 632                                                               |      |
| PfATP2  | ISCDKNMIHKV113NAVPRRTSSLIEELGQIEYIFSDKTGTLTCNIMEFRKCAINGISYKGLTEIKRNLKKNLEIPVEPTMKFKKKT                               | PHVNIIDNDIINH7NHVN          | LINFFLHLAI                                                         | 747                                                               |      |
| PfATP7  | INWDNDMYSEKTGRHALSKAGQLEEMGNVTHIYSDKTGTLTCNV                                                                          | MQLQNI                      | IGL2GTYGFDYFSNIKENITKSRHWGSQDPMDPVLEEYENEENVYSNVN159VQDQIYFLLLVLSL | 895                                                               |      |
| TgATP2A | INSRRVGS                                                                                                              | SPD272EIVARTSDLNEELGQVSYVFS | DKTGTLTENMMEFRKCCI                                                 | QGIRYGDVEVEGEKVRLTQSGGREGLPQEREAPHVKVGDPTLRAALSDPD2MHSHTIDFFLHLAV | 874  |
| TgATP2B | IAQDESMFFHP402GAWPRTSDLNEELGQVSYIFSDKTGTMTSNVMEFRKCCVRGLSYGQGLTEVRRQALRRLGLPVPADPLPPPDEPTTPQVQMVDSALR8MHPYLVDFFLHLAI  |                             |                                                                    | 972                                                               |      |
| ATP8B1  | INWDLQMYAEKDTPAKARTTTLNEQLGQIHYIFSDKTGTLTCNIMTFKKCCINGQIYGDHRDASQHNHNK--IEQVDFSWNTYADGKLAFYDHYLIEQIQSGKEPEVRQFFLLAV   |                             |                                                                    | 533                                                               |      |
| Dnf1    | IYGDVLLYNAKLDYPCTPKSWNISDDLGVVEYIFSDKTGTLTCNVMEFKKCTINGVS                                                             | YGRAYTEALAGLRKRQ            | GIDVETEG31VTFVSK                                                   | EFVRDLKGASGEVQQRCC-EHFMLLAL                                       | 776  |
| PfGCα   | IENDNHISTFE311WGLCLNSNMHGD                                                                                            | LVNDFIFTDKTGTLTCNMTFNMCS    | IAGKTYGSK352KQNFPRPKSFRLNMN                                        | SSVKGRCDFNDTKIYNDLNSQSWRGYYIDEFFKCMTL                             | 1184 |
| TgGC    | IEGDIHIRGGG270WAEVHTPALNPNLGQVDFIFTDKTGTLTCNMTFMSCSVAGKIYGMA396YDNIDFPTGFRETMEGQIRRNCFYDASIFTDLARKDLRSHRINEFKCMAL     |                             |                                                                    | 1256                                                              |      |

|         | N-domain                                                                               | Adenine-binding                          |                                                                       |                                                    |      |
|---------|----------------------------------------------------------------------------------------|------------------------------------------|-----------------------------------------------------------------------|----------------------------------------------------|------|
| ATP8A1  | CHTAVPEREGDKIIYQAASPDGALVRAAQ                                                          | LNQVFTGRTPDSV--IIDSLGQEERYE              | LLNVLEFTSARKRMSVIVRTPSGKLRLYCKGADTVIYDRLAETSK-YKEITLKHLEQFA           | 600                                                |      |
| Drs2p   | CHTVIPEF2DGSIKYQAASPDGALVQGGADLGYKFIIRKPN                                              | SVTVLLEETGEEKEYQLLNICEFNSTRKRMSAIFRFPDGS | IKLFCKGADTVILERLDDEANQYVEATMRHLEDYA                                   | 750                                                |      |
| PfATP2  | NHAVICEK2EGVTTYSSSPDEEALVNAAKHFDITFLYRREGKY--GISIFGKIYEIDTLATIEFTSKRKMSSVICRIP103IMLFC | KGAGSII                                  | LKLA--RTDVEITIEHMETYA                                                 | 962                                                |      |
| PfATP7  | CHSAMIR35QTQPQYDASSPDELALISTSLYLGC                                                     | FVNRPNLTT58MINNK644LSFEILDVFA            | FDNVVRKMSLIVKNEKKEIFMLVKGADTSVLKLA                                    | SKNQENIVDHEVQLHAF                                  | 1143 |
| TgATP2A | NHSALAEH3TGHLCYSANSPDERAFVCAARHF                                                       | GVTFRARTPF                               | GV--ELNVLGRTVHVDILASFP                                                | ESRRRRSSVLCQIS122VLLTKGADMVILPRLRRA51RRKAMETALEAYA | 1160 |
| TgATP2B | NHAVVLET2FGMTRYASASSPDEGALVYGARHF                                                      | GIEFLGQTPSGL--EVS                        | VLGRKLHVRVLASVEFSSKRKRSSMLCEIRY16IVLFTKGADTVILPPLKQ--RREETQMLNTMEEYA  | 1101                                               |      |
| ATP8B1  | CHTVMVDRDQGLNYQAASPDGALVNAARNF                                                         | GFAFLARTQNTI--TISEL                      | GTERTYNVLAILDFNSDRKMSIIIVRTP                                          | PEGNIKLYCKGADTVIYERLHR-MNPTKQETQDALDIFA            | 647  |
| Dnf1    | CHSVLVEA4PKKLDLKAQSPDEAALVATAR                                                         | DVGFVFGTKKGL--IIE                        | MQIQKEFEILNILEFNSSRKRMSCIVKIPGL7ALLICKGADSIISRLSRQSG5ILEKTALHLEQYA    | 904                                                |      |
| PfGCα   | CHAVTP386FDAIKYQSSSLDEECLIIYSSS                                                        | FLGYRLVLRNKNTM--CIEIDG                   | SFNKWTIIGVNEFTNRRGKMSIVVK-PDS4SILYVKGSDSSILSLNLK140RYRRL              | LEKQLRKFS                                          | 1821 |
| TgGC    | CNTVVP396VSIKIQASSPDEECLVSAASHM                                                        | GYTLVSRTN                                | NYA--ILNINQERRWQIIGVNEFTQKGRMSIVVRPQEW3SILYVKGADVAMLDLLSTS231DIALVEQH | LRKFS                                              | 1994 |

|         | N-domain                                                                                               | P-domain                                             | TGD motif                                                   |                           |       |      |
|---------|--------------------------------------------------------------------------------------------------------|------------------------------------------------------|-------------------------------------------------------------|---------------------------|-------|------|
| ATP8A1  | TEGLRTLCLFAVAEISESDFQEWRAVYQRASTSVQNRLLKLEESYELIEKNLQLLGATAIEDKLDQDVPETIETLMKADIKIWIITGDKQETAINIGH     | SKLLKKNMGMI                                          | VINEGSLD                                                    | 717                       |       |      |
| Drs2p   | SEGLRTLCLAMRDISEGEYEWN                                                                                 | SIYNEAATLDNRAEKLEDEAANLIEKNLILIGATAIEDKLDQDVPETIHTLQ | EAGIKIWIITGDRQETAINIGMSCRLLSEDMNLLINEETR                    | 867                       |       |      |
| PfATP2  | DEGLRTLCLIAQRELSEESFAEWYHLYKEASLSIKDREKLE                                                              | SVAEYIENDLILQGITGIEDKLDQEGVSS                        | TIEDLRMAGIHIWMLTGDKIETAMNIGIAANLIDNYSEQFIYTEEYIE            | 1079                      |       |      |
| PfATP7  | TSGLRTLVLGYKYLTENEFSDMYRNHINARKKSE2KEEY                                                                | LQEFYEEAENLLIIGCTGIDDKLQDDVPQVIQDLRD                 | AGMTICVILTGDKLETA                                           | INIGHSINILNKQTYNAIFTETDPT | 1261  |      |
| TgATP2A | GEGLRTLCLIAKRTIDEEEFARWYKEYQKEHTSRT2KEERLYQLAERLEVDLELQGV                                              | TAVEDRLQDDVAMTIVKLRQAGIHVWMLTGDKTETALNVGISTFLVARD    | TRLSRYLWNGRE                                                | 1278                      |       |      |
| TgATP2B | ADGLRTLCLIAKREVDTEFFTFWQAYQQAERATVGRQEQIEAVAERLEVQLELQGITVEDKLDQAGVADTIEKLR                            | AGIKVWMLTGDQVETAINIGFATSLLTREM                       | QRTYVWEELD                                                  | 1218                      |       |      |
| ATP8B1  | NETLRTLCLCYKIEIEKEFTENKFFMAASVASTNRDEALDKVYEEIEKDLILLGATAIEDKLDQDVPETISKLAKADIKIWIITGDKKETAENIGFACELLT | EDTTICYEGDINSL                                       |                                                             | 764                       |       |      |
| Dnf1    | TEGLRTLCLIAQRELSWSEYEKWN                                                                               | EYDIAASLANREDELEVVADSIERELILLGGT                     | AIEDRLQDGVPCIELLAEAGIKLWVITGDKVETAINIGFSCNLLNMEMELLVIKTTGDD | 1021                      |       |      |
| PfGCα   | VKGLRSMIFAFRYLSSEETIKYKRM                                                                              | YDDACSSIYNKEQRLKVAEEFERDLIYLGITGVKNGLQEKVPKTI        | DILNQSGIRIWMILTGDNV                                         | EYSLHVSFLCKFLNKHTKIFHAAL  | ENSN  | 1938 |
| TgGC    | LQGLRTMALACRYLTQEEETETYKRLYTDACASVY                                                                    | CRAERLEVAEDMERDLEYLGITGVRDKLQEQVPE                   | TLQLMMEAGIRVWMLTGDNV                                        | EYALHICHSCRLLTSRTRIFHAAL  | LEFSG | 2111 |

|         | P-domain                                                                                                                                                                                                                                                                                                                                                                                         | Phosphate-binding/ Mg <sup>2+</sup> coordination |      |
|---------|--------------------------------------------------------------------------------------------------------------------------------------------------------------------------------------------------------------------------------------------------------------------------------------------------------------------------------------------------------------------------------------------------|--------------------------------------------------|------|
| ATP8A1  | GTRETLRSR-----CTTLGDALRKENDFALIIDGKTLKYALTFGRVQYFLDLALSCKAVICCRVSP <sup>1</sup> LQKSEVEMVKKQVKVVTLAI <b>GDGAND</b> VSMIQTAHVGVGISGNEGL                                                                                                                                                                                                                                                           |                                                  | 824  |
| Drs2p   | DTERNLLEK-----INALNEHQLSTHDMNTLALVIDGKSLGFALPELEDYLLTVAKLCKAVICCRVSP <sup>1</sup> LQKALVVKMVKRKSLLAI <b>GDGAND</b> VSMIQAAHVGVGISGMEGM                                                                                                                                                                                                                                                           |                                                  | 977  |
| PfATP2  | 45NF IKNFFCAKNKSGLLLNPDKYNMLINTLN <sup>1</sup> VLVVDG <sup>2</sup> SVIDL <sup>3</sup> LLSEKMERKFFYLADKCSSVICG <sup>4</sup> RVSPY <sup>5</sup> QKGAIVSSANRLLNKITLAI <b>GDGAND</b> RNMINTANIGIGIRGQEGV                                                                                                                                                                                             |                                                  | 1239 |
| PfATP7  | 85NSFLESSESFCHNNNEMDKTKGKEKVHYSQFSITITGEALDVIMK-DLKIKFYTLARSASTLIACRVTPKQKSLLVKENSANFP <sup>2</sup> TSLAI <b>GDGAND</b> VGMILMANVGVGIAGKEGL                                                                                                                                                                                                                                                      |                                                  | 1463 |
| PfATP2A | 33KWSGHPREAEDSRAETGSEGGDQAVREPPEALIVDGEALTF <sup>1</sup> LFE <sup>2</sup> ERQCAFIRLCCACRAVICCR <sup>3</sup> LAPHQKGA <sup>4</sup> VVSLVKKTTQKVTLAI <b>GDGSND</b> CNMLLQAHIGVIRGNEGN                                                                                                                                                                                                              |                                                  | 1427 |
| TgATP2B | 10EAQEMSI LAKHQKSGRGEAKGSPGRERQAHALVVDGEALQQMLEPDMQLFVSVCTNCVTVICSRVTPH <sup>1</sup> QKGA <sup>2</sup> VVSLIKRHLQKITLAI <b>GDGAND</b> CNMIQSADIGIGLKGEEGM                                                                                                                                                                                                                                        |                                                  | 1343 |
| ATP8B1  | LHARMENQRNRGGVYAKFAPPVQESFFPPGGNRALIIITGSWLNEL <sup>1</sup> 37QRQNFVDLACECSAVICCRVTPKQKAMVVDLVKRYKKAITLAI <b>GDGAND</b> VNMIKTAHIGVIGISGQEGM                                                                                                                                                                                                                                                     |                                                  | 916  |
| Dnf1    | VKEFGSEPS <sup>1</sup> EIVDALLSKYLKEYF <sup>2</sup> 16EFPKGN <sup>3</sup> YAI <sup>4</sup> VDG <sup>5</sup> DALKLALY <sup>6</sup> 2DIRRKL <sup>7</sup> LLCKNCRAVLCC <sup>8</sup> RVSP <sup>9</sup> QKA <sup>10</sup> AVV <sup>11</sup> KLVD <sup>12</sup> SLD <sup>13</sup> VM <sup>14</sup> TLAI <b>GDGSND</b> VAMIQSADVGIAGEEGR                                                                |                                                  | 1153 |
| PfGCα   | AKKLR <sup>1</sup> REGMALYELF-----QLEKEEK <sup>2</sup> PYENL <sup>3</sup> LLV <sup>4</sup> GN <sup>5</sup> GRNL <sup>6</sup> Q <sup>7</sup> TFLN <sup>8</sup> 2DLQ <sup>9</sup> TH <sup>10</sup> FLNMA <sup>11</sup> CTCDV <sup>12</sup> VIA <sup>13</sup> CRITAK <sup>14</sup> QAF <sup>15</sup> LV <sup>16</sup> QLIK <sup>17</sup> NRLY <sup>18</sup> 3NTLAI <b>GDGAND</b> IAMIQEANIGVIMTSDCI |                                                  | 2053 |
| TgGC    | RKAKREGVMLYELFR-----KARRLK <sup>1</sup> RSDEHIC <sup>2</sup> LVVT <sup>3</sup> GNL <sup>4</sup> RTFLN <sup>5</sup> 2DLQ <sup>6</sup> TY <sup>7</sup> FLNMA <sup>8</sup> CCSDV <sup>9</sup> VVAA <sup>10</sup> RVTP <sup>11</sup> SQKA <sup>12</sup> EMV <sup>13</sup> RLV <sup>14</sup> KKRLT <sup>15</sup> 3ITMAV <b>GDGGND</b> VAMLQEAHVGVAIRGKDSA                                             |                                                  | 2225 |

|         | P-domain                                                                                                                                                                                                                                                                                                                                                                                                                                              | TM5 | TM6 |      |
|---------|-------------------------------------------------------------------------------------------------------------------------------------------------------------------------------------------------------------------------------------------------------------------------------------------------------------------------------------------------------------------------------------------------------------------------------------------------------|-----|-----|------|
| ATP8A1  | QAANSSDYSIAQFKYLKNLLMIHGAWNYNRVSKCILCYFKNIVLYIIIEIWF <sup>1</sup> AFVNGFSGQILFERW <sup>2</sup> CI <sup>3</sup> GLYNV <sup>4</sup> MFTAMP <sup>5</sup> PLTLGIFERSCRKENMLKYP <sup>6</sup> ELYKTSQNALDFNTKVF                                                                                                                                                                                                                                             |     |     | 941  |
| Drs2p   | DAARSADIAVGQFKFLKLLLVHGSWSYQRI <sup>1</sup> SVAILYSFYKNTALYMTQFWYVFANAFSGQSIMESW <sup>2</sup> MSFYNL <sup>3</sup> F <sup>4</sup> FTVW <sup>5</sup> PPFVIGVFDQFVSSRLLERYP <sup>6</sup> QLYKLGKQGF <sup>7</sup> F <sup>8</sup> SVYIF                                                                                                                                                                                                                    |     |     | 1094 |
| PfATP2  | QAFNSSDYGISQFRFLKNLLLVHGRLSYRRI <sup>1</sup> SKLVVYMFYK <sup>2</sup> NMVLIFPLFIFGSI <sup>3</sup> LSYSGKIYF <sup>4</sup> EFLHL <sup>5</sup> FNVLFTA <sup>6</sup> IPVVIH <sup>7</sup> AVLDQD <sup>8</sup> ISLNTAMEK <sup>9</sup> PNLYKLGIIHHYYFNIRTF                                                                                                                                                                                                    |     |     | 1356 |
| PfATP7  | QAARSSDFTISEFKYLKLLLVHGRRESLRNNSFLVYFCIFRNVSFCLCSMILI <sup>1</sup> FWTGYSAIDAWN <sup>2</sup> PWTKQIINIAFTSL <sup>3</sup> PVIF <sup>4</sup> FVALDKQLPHN <sup>5</sup> ILN <sup>6</sup> NPLLY <sup>7</sup> 61Y <sup>8</sup> GTHYL <sup>9</sup> FVYLLF                                                                                                                                                                                                    |     |     | 1644 |
| TgATP2A | QAFNCSDFGVTQFRLLLP <sup>1</sup> LLL <sup>2</sup> VHGRWCYRRI <sup>3</sup> TTVILYIIYKN <sup>4</sup> FL <sup>5</sup> LVLP <sup>6</sup> LVYFG <sup>7</sup> FLCLFSGQRFY <sup>8</sup> PEVLA <sup>9</sup> QTYN <sup>10</sup> PVLTAMP <sup>11</sup> ITLYGVLEQ <sup>12</sup> IDERASL <sup>13</sup> KFP <sup>14</sup> QLYR <sup>15</sup> LGQADS <sup>16</sup> FLN <sup>17</sup> LRTC                                                                            |     |     | 1544 |
| TgATP2B | QAFNCSDDYGLVQFRLLLP <sup>1</sup> LLL <sup>2</sup> THGSWN <sup>3</sup> YRRI <sup>4</sup> SKLVLYMFYK <sup>5</sup> NLV <sup>6</sup> LVLP <sup>7</sup> FFF <sup>8</sup> GYISL <sup>9</sup> FSGQK <sup>10</sup> FYFE <sup>11</sup> FLYQ <sup>12</sup> MNVVFTA <sup>13</sup> IPITLYGVFDQ <sup>14</sup> VD <sup>15</sup> DKL <sup>16</sup> LAL <sup>17</sup> KYP <sup>18</sup> QLYR <sup>19</sup> CGQID <sup>20</sup> LYL <sup>21</sup> NL <sup>22</sup> RVF |     |     | 1460 |
| ATP8B1  | QAVMSSDYSFAQFRYLQRL <sup>1</sup> LLL <sup>2</sup> VHGRWSYIR <sup>3</sup> MCKFL <sup>4</sup> RYFFYK <sup>5</sup> NAFTLV <sup>6</sup> HFWYSFFN <sup>7</sup> GYSAQ <sup>8</sup> TAYEDW <sup>9</sup> FTLY <sup>10</sup> NVLYTSL <sup>11</sup> PVLLMGLLD <sup>12</sup> QDV <sup>13</sup> SDKLS <sup>14</sup> LRFP <sup>15</sup> GLYIV <sup>16</sup> GQRDLL <sup>17</sup> FNYKRF                                                                            |     |     | 1033 |
| Dnf1    | QAVMSSDYAIGQFRYLARLVLVHGRWSYKRLAEMIPEFFYKNMIFALALFWYGIYND <sup>1</sup> FDGS <sup>2</sup> LYEYTYMMFYN <sup>3</sup> LAF <sup>4</sup> TS <sup>5</sup> LPVIFL <sup>6</sup> GILD <sup>7</sup> QDV <sup>8</sup> NDTIS <sup>9</sup> LVV <sup>10</sup> P <sup>11</sup> QLYR <sup>12</sup> VGIR <sup>13</sup> KEWN <sup>14</sup> QRKFL                                                                                                                         |     |     | 1271 |
| PfGCα   | ISAGYSDYCIKKFCYLRKLLFY <sup>1</sup> GSKHLYT <sup>2</sup> ISII <sup>3</sup> LYWN <sup>4</sup> FFKN <sup>5</sup> ILLIL <sup>6</sup> PIFFYQAYAS <sup>7</sup> WCVKI <sup>8</sup> PEL <sup>9</sup> LYTF <sup>10</sup> FSIF <sup>11</sup> FWVF <sup>12</sup> IP <sup>13</sup> IYYM <sup>14</sup> FLQHN <sup>15</sup> LYND <sup>16</sup> ILYNI <sup>17</sup> PLFYALSRRRYNMNCFK <sup>18</sup> F                                                               |     |     | 2170 |
| TgGC    | AA <sup>1</sup> 3AYADYSFTEFRFLQRL <sup>2</sup> LVHGR <sup>3</sup> LSLMRVSTVIL <sup>4</sup> WSFFKSLCIGLPTFLFQ <sup>5</sup> QAFWSAVEVYD <sup>6</sup> PLLMI <sup>7</sup> VDFFW <sup>8</sup> TLP <sup>9</sup> GI <sup>10</sup> IHGYS <sup>11</sup> DQDL <sup>12</sup> PTHLL <sup>13</sup> PSV <sup>14</sup> PVLYTP <sup>15</sup> GRRRLY <sup>16</sup> FNGFRF                                                                                              |     |     | 2344 |

|         | TM7                                                                                                                                                                                                                                                                                                                                                                                                                                                                                               | TM8 | TM9 |      |
|---------|---------------------------------------------------------------------------------------------------------------------------------------------------------------------------------------------------------------------------------------------------------------------------------------------------------------------------------------------------------------------------------------------------------------------------------------------------------------------------------------------------|-----|-----|------|
| ATP8A1  | WVHCLNGLFHSVILFWFPLKALQYGTAFNGKTS <sup>1</sup> SDYLLGNF <sup>2</sup> VYTFVVI <sup>3</sup> TVCLKAGLET <sup>4</sup> SYWTFW-SHIAI <sup>5</sup> WGSIAL <sup>6</sup> LWV <sup>7</sup> VFFGIYSSLWPAIPMAPDMSG <sup>8</sup> EAML--FSSGV <sup>9</sup> FWMGL                                                                                                                                                                                                                                                |     |     | 1055 |
| Drs2p   | WGWIINGF <sup>1</sup> FHSAIV <sup>2</sup> FIGTIL <sup>3</sup> IYRYGFALNMHGELADHWSWGVTVYTTS <sup>4</sup> VII <sup>5</sup> VLGKAALV <sup>6</sup> TNQWTKFTLIAIPGS <sup>7</sup> LLFWLIFFP <sup>8</sup> YAS--IFPHANISREYYGV <sup>9</sup> VKHTYGS <sup>10</sup> GVFWLTL                                                                                                                                                                                                                                 |     |     | 1209 |
| PfATP2  | ISWVMNSLFHGSVVFLIPLYFLSYINI <sup>1</sup> PTSDGIPYDIWTVGCATYFLT <sup>2</sup> VLIVNFKILFET---YYLNILPIS <sup>3</sup> GIALSIFSFVLLVTA <sup>4</sup> FSFMCVGSIHLLGT-----IVYLVQ                                                                                                                                                                                                                                                                                                                          |     |     | 1460 |
| PfATP7  | AIWLATVETVIMLHFSTSQILYTHHVI <sup>1</sup> AVNIVVLMNTWFF <sup>2</sup> ISHVVLWIELIATFFFWF---IISNTKFFLDI <sup>3</sup> GADELHGT <sup>4</sup> FEKAHSSG-----NYYASL                                                                                                                                                                                                                                                                                                                                       |     |     | 1759 |
| TgATP2A | ISWILLGVVHAAIFVVGLYAFGYIIPGSPGQPFDMVMVGTVMMAANCLVANLAILFYS---FSVSAV <sup>1</sup> TWCGIA <sup>2</sup> FSLFSCLV <sup>3</sup> LFFA <sup>4</sup> ASTATVGGISTGAI <sup>5</sup> FL <sup>6</sup> LKASPTICLY <sup>7</sup> VLV                                                                                                                                                                                                                                                                              |     |     | 1658 |
| TgATP2B | LKWM <sup>1</sup> LNGVWQAIVIFVVP <sup>2</sup> TFV <sup>3</sup> FGCNAVPTTGR <sup>4</sup> TMDLW <sup>5</sup> VGTV <sup>6</sup> MFMMN <sup>7</sup> MIVV <sup>8</sup> NIKV <sup>9</sup> LLET---YLT <sup>10</sup> TI <sup>11</sup> IWAG <sup>12</sup> FYISL <sup>13</sup> LACLLFV <sup>14</sup> FL <sup>15</sup> SSW <sup>16</sup> PGFAGSV <sup>17</sup> LGCV <sup>18</sup> FYLFIDAAACAVIAT                                                                                                            |     |     | 1574 |
| ATP8B1  | FVSLHGVLTSMILFFIPLGAYLQTVGQDGE-APS <sup>1</sup> DYQSFAV <sup>2</sup> TIASALVI <sup>3</sup> TVNFQIGL <sup>4</sup> TSYWTFVNA <sup>5</sup> SIFGSIALYFGIM <sup>6</sup> DFH <sup>7</sup> SAGIH <sup>8</sup> VLFP <sup>9</sup> SAFQFTGTAS <sup>10</sup> NLRQ <sup>11</sup> PYI <sup>12</sup> WLT <sup>13</sup> I                                                                                                                                                                                        |     |     | 1149 |
| Dnf1    | WYM-LDGLYQSICFFFPYLVYHKNMIVT <sup>1</sup> S <sup>2</sup> NGLGLD <sup>3</sup> HRYFVG <sup>4</sup> VYVTTIA <sup>5</sup> AVISCNTYVLLH <sup>6</sup> QYRWDW---FSG <sup>7</sup> FLIALSCLV <sup>8</sup> VFAWTGI <sup>9</sup> WSSAIASREFFKAAARIY <sup>10</sup> GAPS-FWAV <sup>11</sup> F                                                                                                                                                                                                                  |     |     | 1382 |
| PfGCα   | LPWIFEAIFYSMIYFFAYAA <sup>1</sup> LKENS <sup>2</sup> HLNN-GEVITINT <sup>3</sup> FGNIC <sup>4</sup> FIGCLLISILR <sup>5</sup> LFLE <sup>6</sup> GLWS <sup>7</sup> SPSILITCF <sup>8</sup> GCF <sup>9</sup> LVF <sup>10</sup> FP <sup>11</sup> SL <sup>12</sup> LFIC <sup>13</sup> FAYLS <sup>14</sup> NEYIREVFRQT <sup>15</sup> FLWAP <sup>16</sup> LYVLLI <sup>17</sup> LWF                                                                                                                         |     |     | 2286 |
| TgGC    | ILWTV <sup>1</sup> EGIIYSFLIF <sup>2</sup> YLLQAT <sup>3</sup> WMDGNT <sup>4</sup> FHD-GQVLG <sup>5</sup> FHSYGI <sup>6</sup> LL <sup>7</sup> LFGS <sup>8</sup> LL <sup>9</sup> QSNVRI <sup>10</sup> IILE <sup>11</sup> TS <sup>12</sup> LWTP <sup>13</sup> TL <sup>14</sup> FT <sup>15</sup> IVL <sup>16</sup> CTIM <sup>17</sup> F <sup>18</sup> PTV <sup>19</sup> LLYS <sup>20</sup> VTGW <sup>21</sup> PRRYMELAGR <sup>22</sup> VVFAW <sup>23</sup> PMLY <sup>24</sup> FLI <sup>25</sup> PLWV |     |     | 2460 |

TM10

|         |                                     |      |
|---------|-------------------------------------|------|
| ATP8A1  | LFIPVASLLLDVYKVIKRTAFKTLVDEVQELEA   | 1089 |
| Drs2p   | IVLPIFALVRDFLWKYYKRMYPETYHVIQEMQK   | 1243 |
| PfATP2  | SLRFWLVIILGLFTALLRDYVFKVYKRNFNPEIY  | 1494 |
| PfATP7  | TIISLYISILPLIILMTYQFIKKPTMEQIVLEQLK | 1793 |
| TgATP2A | ACSLSLGLLWFKRSFRVAFRPELYDVLQRHEYLG  | 1692 |
| TgATP2B | VAVTSLCLARDWLWKAFRVNCAPLYHLIQQREY   | 1608 |
| ATP8B1  | ILAVAVCLLPVVAIRFLSMTIWPSESDKIQKHRK  | 1183 |
| Dnf1    | FVAVLFCLLPFRFTYDSFQKFFYPTDVEIVREMWQ | 1416 |
| PfGCα   | STCIISYIFINFTKSILFPNIYNVNVNHWLFEQYQ | 2320 |
| TgGC    | SIGILVQLLLQVFTSSLPNISGSVKQYLAQKQA   | 2494 |
